# Supplementary material for: Room-temperature Pd/Ag direct arylation enabled by a radical pathway
Source: publisher site journal article supplement (doi:10.3762/bjoc.16.36), 2020-03-13
Supplement: Additional file 1 [file 1860-5397-16-36-S1.pdf]

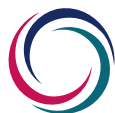

## Supporting Information

for

### Room-temperature Pd/Ag direct arylation enabled by a radical pathway

Amy L. Mayhugh and Christine K. Luscombe

*Beilstein J. Org. Chem.* **2020**, *16*, 384–390. [doi:10.3762/bjoc.16.36](https://doi.org/10.3762/bjoc.16.36)

**Additional condition screenings, experimental procedures,  
and compound characterization including  $^1\text{H}$  and  $^{13}\text{C}$  NMR  
spectra**

## Table of Contents

|                                           |    |
|-------------------------------------------|----|
| High temperature conditions .....         | S2 |
| Additional radical trap experiments ..... | S2 |
| General information.....                  | S3 |
| Direct arylation procedures .....         | S3 |
| Starting materials characterization ..... | S4 |
| Products characterization.....            | S4 |
| References.....                           | S6 |
| Polyindole characterization .....         | S7 |
| NMR Spectra.....                          | S9 |

## High temperature conditions:

Table S1: High temperature trials

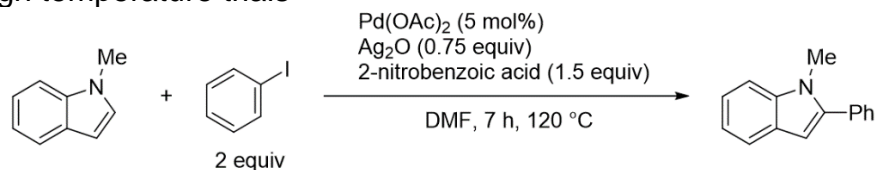

|   | Variation          | Conversion (%) <sup>a</sup> | Yield (%) <sup>a</sup> |
|---|--------------------|-----------------------------|------------------------|
| 1 | None               | 99                          | 63                     |
| 2 | Dark               | 99                          | 70                     |
| 3 | + BHT <sup>b</sup> | 47                          | 25                     |

<sup>a</sup>Determined by <sup>1</sup>H NMR using ethylene carbonate as an internal standard. <sup>b</sup>1.1 equiv used. Other products include 2,3-diphenyl-1-methylindole.

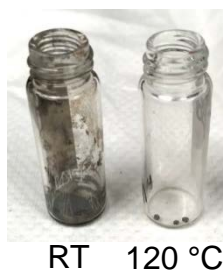

Figure S1: Silver mirroring is not observed at high temperature.

## Additional radical trap experiments:

Table S2: 1-Octylindole and iodobenzene radical trap experiments.

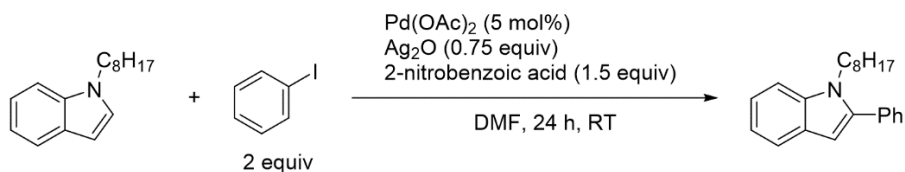

|   | Variation               | Yield (%) <sup>a</sup> |
|---|-------------------------|------------------------|
| 1 | + TEMPO <sup>a,b</sup>  | Trace                  |
| 2 | Dark                    | Trace                  |
| 3 | No Pd(OAc) <sub>2</sub> | 0                      |

<sup>a</sup>Determined by GC-MS. <sup>b</sup>1.1 equiv used.

### **General information:**

All reactions were carried out under nitrogen atmosphere using standard Schlenk techniques unless otherwise noted. NMR spectra were recorded on Bruker AV-300 and AV-500 spectrometers operating at 300 and 500 MHz, respectively. NMR chemical shifts ( $\delta$ ) are reported in parts per million (ppm) downfield of tetramethylsilane and are referenced relative to the residual solvent signal for  $^1\text{H}$  NMR ( $\text{CDCl}_3$  (7.26 ppm)) and  $^{13}\text{C}$  NMR ( $\text{CDCl}_3$  (77.16 ppm)).  $^{19}\text{F}$  NMR was referenced against hexafluoroisopropanol (-76.4 ppm). When indicated, ethylene carbonate was used as an internal standard for quantitative NMR and stored under nitrogen between uses. An Agilent 5973 Gas Chromatograph - Mass Spectrometer (EI) was used to perform GC-MS analysis. MALDI-TOF MS was collected using a Bruker AutoFlex II instrument with a terthiophene matrix. DMF and THF were dried and degassed on an Inert PureSolv solvent purification system. Deuterated solvents were stored over 4 Å molecular sieves. All other reagents and chemicals were purchased from Sigma-Aldrich or Tokyo Chemical International and used without purification. Column chromatography was performed using VWR Common Silica Gel 60 Å.

### **Direct arylation procedures:**

**Polymerizations:** To a flame-dried Schlenk tube was added  $\text{Pd}(\text{OAc})_2$  (5 mol %, 0.025 mmol),  $\text{Ag}_2\text{O}$  (0.75 equiv, 0.15 mmol), and 2-nitrobenzoic acid (1.5 equiv, 0.3 mmol). Radical trapping agents were added at this time (1.1 equiv, 0.22 mmol). The flask was evacuated and backfilled with  $\text{N}_2$  three times. DMF was added (0.5 M), followed by iodoindole (1 equiv, 0.2 mmol). The reaction was allowed to stir at room temperature (22 °C). After the required time, the reaction mixture was filtered through silica using  $\text{CH}_2\text{Cl}_2$  to transfer and concentrated to dryness. The product was purified using Soxhlet extraction under  $\text{N}_2$  with MeOH and collected with  $\text{CHCl}_3$ .

**General procedure – small molecule:** Based on the literature method [1]. To an oven-dried vial was added  $\text{Pd}(\text{OAc})_2$  (5 mol%, 0.025 mmol),  $\text{Ag}_2\text{O}$  (0.75 equiv, 0.15 mmol), 2-nitrobenzoic acid (1.5 equiv, 0.3 mmol), and BHT if used (1.1 equiv, 0.22 mmol). The flask was evacuated and backfilled with  $\text{N}_2$  three times. DMF was added (0.5 M), followed by indole (1 equiv, 0.2 mmol) and the iodoarene (2 equiv, 0.4 mmol). The reaction was allowed to stir at room temperature (22 °C). After the required time, the reaction mixture was filtered through silica using  $\text{CH}_2\text{Cl}_2$  to transfer and concentrated. Purification was performed using column chromatography (hexanes/EtOAc).

**Dark trials:** The general procedures were performed with the following changes: before adding reagents, the flask is wrapped in aluminum foil. After the allotted time, while still wrapped in foil the reaction mixture is quenched with 2 mL saturated EDTA solution, extracted with 5 mL  $\text{CH}_2\text{Cl}_2$  three times, dried over  $\text{MgSO}_4$ , filtered, and concentrated.

### Starting materials characterization:

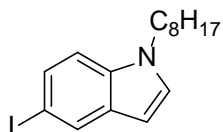

**5-Iodo-1-octylindole (1):** A flame-dried 3-necked round bottomed flask was charged 5-iodoindole (1 equiv, 4.1 mmol). THF was added (10 mL). The flask was cooled to  $-78\text{ }^{\circ}\text{C}$  and sodium hydride (60% dispersion in mineral oil, 1.2 equiv, 4.9 mmol) was added against  $\text{N}_2$ . After stirring for one hour, iodoctane (1.5 equiv, 6.2 mmol) was added and the reaction was allowed to stir overnight at room temperature. The mixture was diluted with  $\text{H}_2\text{O}$ , and extracted 3 times with  $\text{Et}_2\text{O}$ . The combined organic layers were washed with brine, dried over  $\text{MgSO}_4$ , filtered, concentrated, and purified by column chromatography (hexanes with  $\text{EtOAc}$  gradient) to obtain a yellow oil (58%).

$R_f = 0.3$  (hexanes)

**$^1\text{H NMR}$**  (300 MHz,  $\text{CDCl}_3$ )  $\delta$  7.99 (t,  $J = 1.6$  Hz, 1H), 7.47 (dd,  $J = 8.7, 1.6$  Hz, 1H), 7.13 (d,  $J = 8.6$  Hz, 1H), 7.07 (d,  $J = 3.1$  Hz, 1H), 6.43 (d,  $J = 3.1$  Hz, 1H), 4.08 (t,  $J = 7.1$  Hz, 2H), 1.82 (p,  $J = 7.1$  Hz, 2H), 1.31 (q,  $J = 4.5, 3.8$  Hz, 10H), 0.92 (td,  $J = 6.8, 1.7$  Hz, 3H).  
 **$^{13}\text{C NMR}$**  (126 MHz,  $\text{CDCl}_3$ )  $\delta$  135.13, 131.21, 129.89, 129.69, 129.61, 129.52, 128.64, 111.46, 100.34, 82.74, 46.58, 31.85, 30.26, 29.24, 27.02, 22.71. Spectra shown in Figure S4.

**GC-MS** (EI) calculated for  $[\text{M}]^+$  355.1, found 355.1

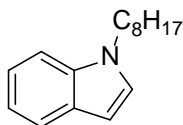

**1-Octylindole:** Prepared according to the literature procedure, and exhibited matching spectral data [2] (Figure S5). A clear oil was obtained in 65% yield.

$R_f = 0.25$  (hexanes)

**$^1\text{H NMR}$**  (500 MHz,  $\text{CDCl}_3$ )  $\delta$  7.78 (d,  $J = 7.9$  Hz, 1H), 7.46 (d,  $J = 8.2$  Hz, 1H), 7.34 (t,  $J = 7.6$  Hz, 1H), 7.28 – 7.21 (m, 1H), 7.21 – 7.17 (m, 1H), 6.62 (t, 1H), 4.19 (t,  $J = 7.2$  Hz, 1H), 1.97 – 1.91 (m, 2H), 1.45 – 1.38 (m, 11H), 1.03 (t,  $J = 7.0$  Hz, 2H).

**$^{13}\text{C NMR}$**  (126 MHz,  $\text{CDCl}_3$ )  $\delta$  135.92, 128.56, 127.67, 121.21, 120.86, 109.31, 100.77, 46.30, 31.75, 30.19, 29.13, 26.96, 22.58, 14.04.

**GC-MS** (EI) calculated for  $[\text{M}]^+$  229.2, found 229.3

### Products Characterization:

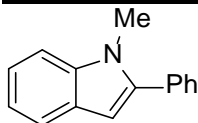

**2-Phenyl-1-methylindole (3):** prepared according to the literature procedure and exhibited matching spectral data [1] (Figure S6). White crystals were obtained in 85% yield.

$R_f = 0.2$  (98:2 hexanes:EtOAc)

**<sup>1</sup>H NMR** (300 MHz, CDCl<sub>3</sub>) δ 7.64 (d, *J* = 7.7 Hz, 1H), 7.58 – 7.32 (m, 6H), 7.15 (t, *J* = 7.4 Hz, 1H), 6.57 (s, 1H), 3.76 (s, 3H).

**<sup>13</sup>C NMR** (126 MHz, CDCl<sub>3</sub>) δ 141.57, 138.36, 132.87, 129.38, 128.48, 127.97, 127.85, 121.66, 120.47, 119.85, 109.59, 101.66, 31.15.

**GC-MS** (EI) calculated for [M]<sup>+</sup> 207.1, found 207.1

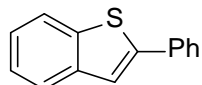

**2-Phenylbenzothiophene (12):** Prepared according to the literature procedure and exhibited matching spectral data [3] (Figure S7). The title compound was obtained as a white solid in 79% yield.

*R<sub>f</sub>* = 0.4 (hexanes)

**<sup>1</sup>H NMR** (300 MHz, CDCl<sub>3</sub>) δ 7.84 (d, *J* = 7.4 Hz, 1H), 7.78 (d, *J* = 7.0 Hz, 1H), 7.73 (d, *J* = 7.2 Hz, 2H), 7.55 (s, 1H), 7.44 (t, *J* = 7.4 Hz, 2H), 7.34 (ddd, *J* = 8.6, 5.3, 1.7 Hz, 3H).

**<sup>13</sup>C NMR** (126 MHz, CDCl<sub>3</sub>) δ 140.70, 139.52, 134.31, 128.95, 128.27, 126.51, 124.51, 124.31, 123.56, 122.27, 119.45.

**GC-MS** (EI) calculated for [M]<sup>+</sup> 210.1, found 210.2

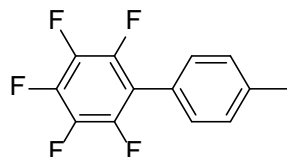

**4-Methyl-2',3',4',5',6'-pentafluoro-1,1'-biphenyl (13):** Prepared according to the literature procedure, and exhibited matching spectral data [4,5] (Figure S8). The title compound was obtained as a white solid in 52% yield.

*R<sub>f</sub>* = 0.45 (hexanes)

**<sup>1</sup>H NMR** (300 MHz, CDCl<sub>3</sub>) δ 7.31 (s, 4H), 2.43 (s, 3H).

**<sup>13</sup>C NMR** (excluding C<sub>6</sub>F<sub>5</sub>, 75 MHz, CDCl<sub>3</sub>) δ 139.58, 130.15, 129.61, 123.57, 21.45.

**<sup>19</sup>F NMR** (470 MHz, CDCl<sub>3</sub>) δ -144.50 (dd, *J* = 26.3, 9.4 Hz), -157.25 (t, *J* = 22.4 Hz), -162.45 -164.41 (m).

**GC-MS** (EI) calculated for [M]<sup>+</sup> 258.2, found 258.1

**Radical trap adducts:**

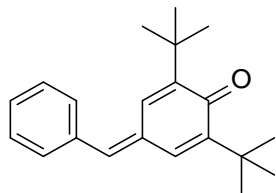

**GC-MS** (EI) calculated for [M]<sup>+</sup> 294.2, found 294.3

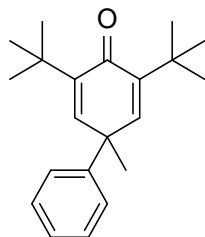

**GC-MS** (EI) calculated for [M]<sup>+</sup> 296.2, found 296.3

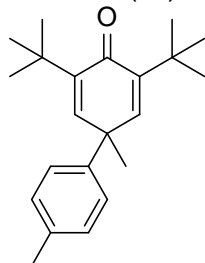

**GC-MS** (EI) calculated for [M]<sup>+</sup> 310.2, found 310.2

**References:**

- (1) Lebrasseur, N.; Larrosa, I. *J. Am. Chem. Soc.* **2008**, *130* (10), 2926–2927.
- (2) Sun, Q. K.; Liu, W.; Ying, S. A.; Wang, L. L.; Xue, S. F.; Yang, W. J. *RSC Adv.* **2015**, *5* (89), 73046–73050.
- (3) Colletto, C.; Panigrahi, A.; Fernández-Casado, J.; Larrosa, I. *J. Am. Chem. Soc.* **2018**, *140* (30), 9638–9643.
- (4) René, O.; Fagnou, K. *Org. Lett.* **2010**, *12* (9), 2116–2119.
- (5) Korenaga, T.; Kosaki, T.; Fukumura, R.; Ema, T.; Sakai, T. *Org. Lett.* **2005**, *7* (22), 4915–4917.

### Polyindole characterization:

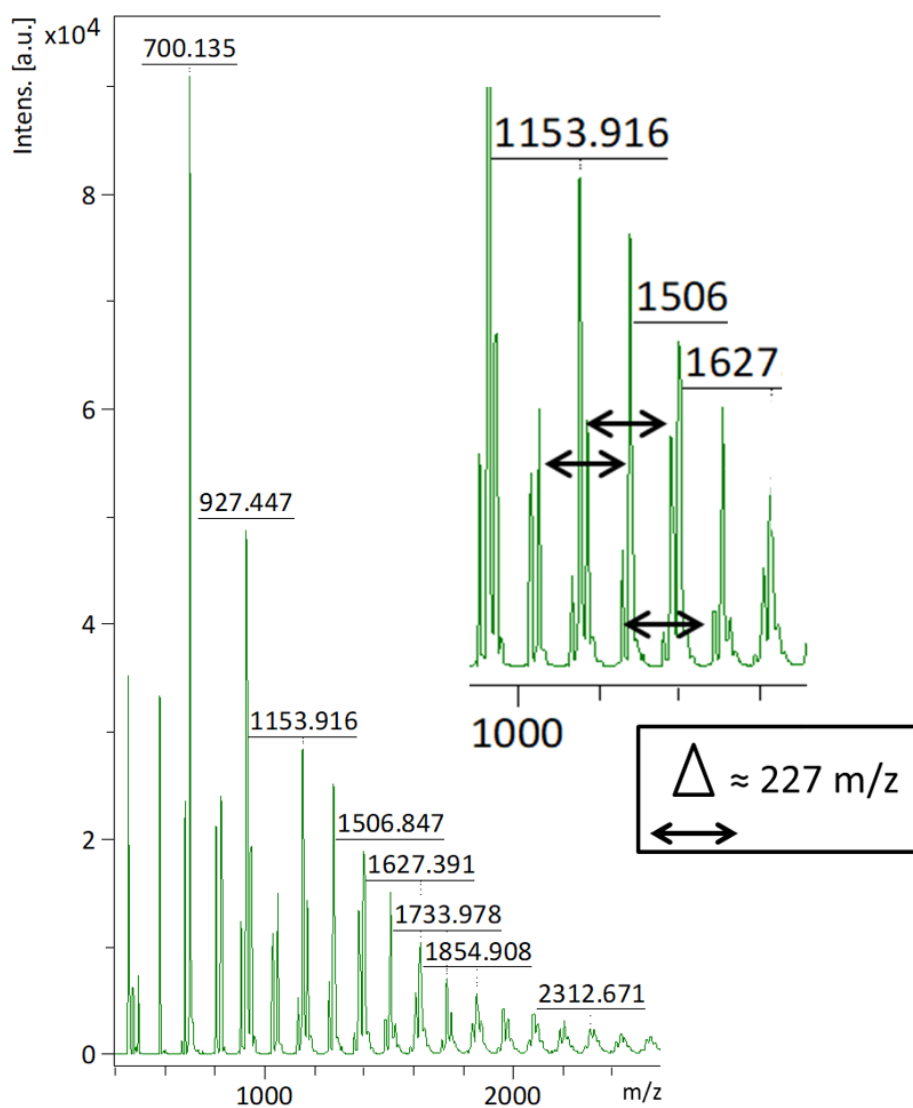

| n | 2 C <sub>6</sub> H <sub>4</sub> -NO <sub>2</sub> / I | C <sub>6</sub> H <sub>4</sub> -NO <sub>2</sub> / H | 2 C <sub>6</sub> H <sub>4</sub> -NO <sub>2</sub> |
|---|------------------------------------------------------|----------------------------------------------------|--------------------------------------------------|
| 1 | -                                                    | -                                                  | 472                                              |
| 2 | 826                                                  | 579                                                | 700                                              |
| 3 | 1053                                                 | 806                                                | 927                                              |
| 4 | 1279                                                 | 1033                                               | 1153                                             |
| 5 | 1506                                                 | 1260                                               | 1380                                             |
| 6 | 1733                                                 | 1487                                               | 1608                                             |
|   |                                                      | 1493                                               |                                                  |

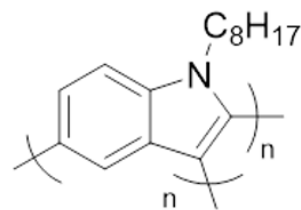

**Figure S2:** MALDI-TOF MS for branched polyindole, with key peaks summarized in the table based on end group identity.



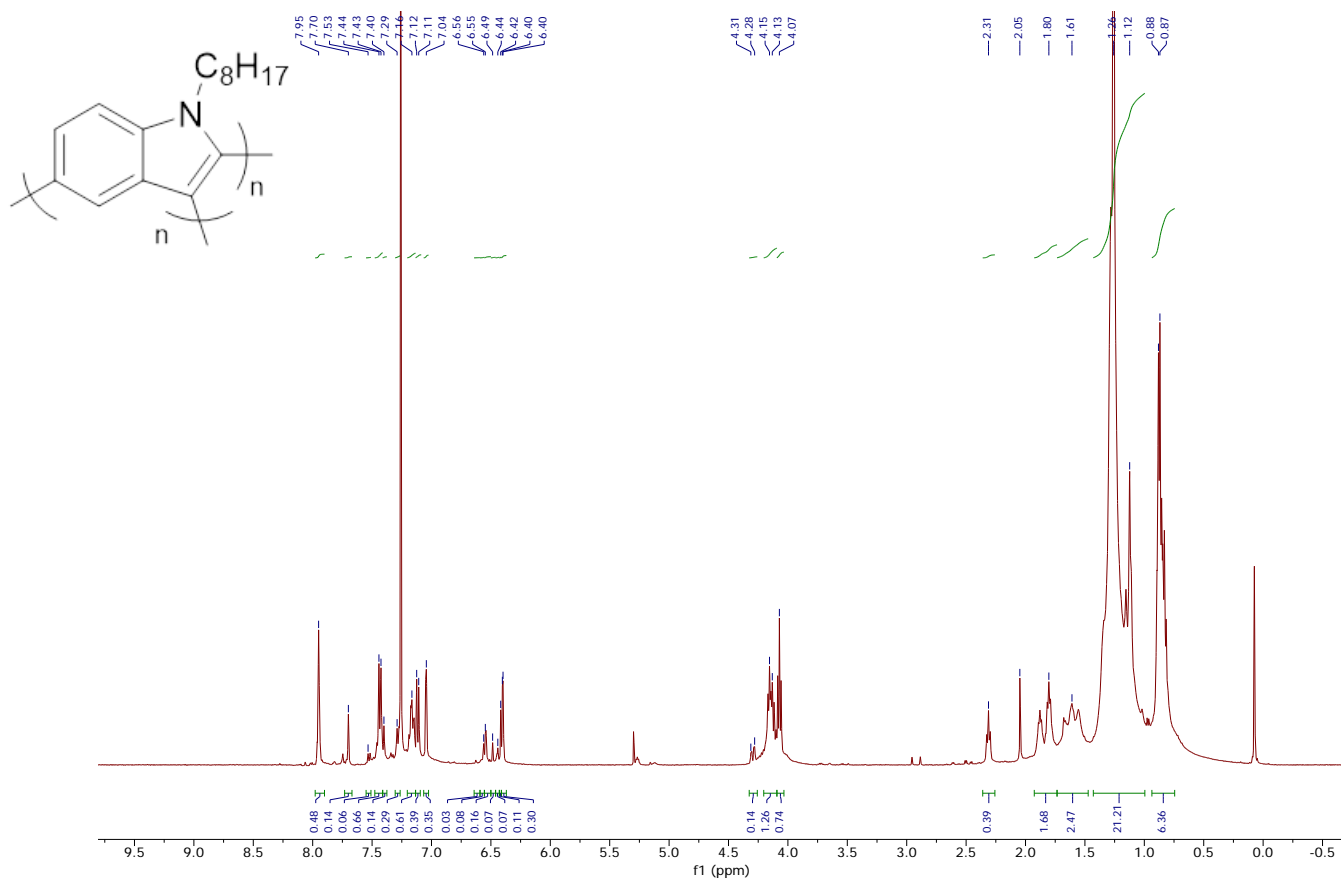

Figure S3: <sup>1</sup>H NMR of polyindole .

# NMR Spectra

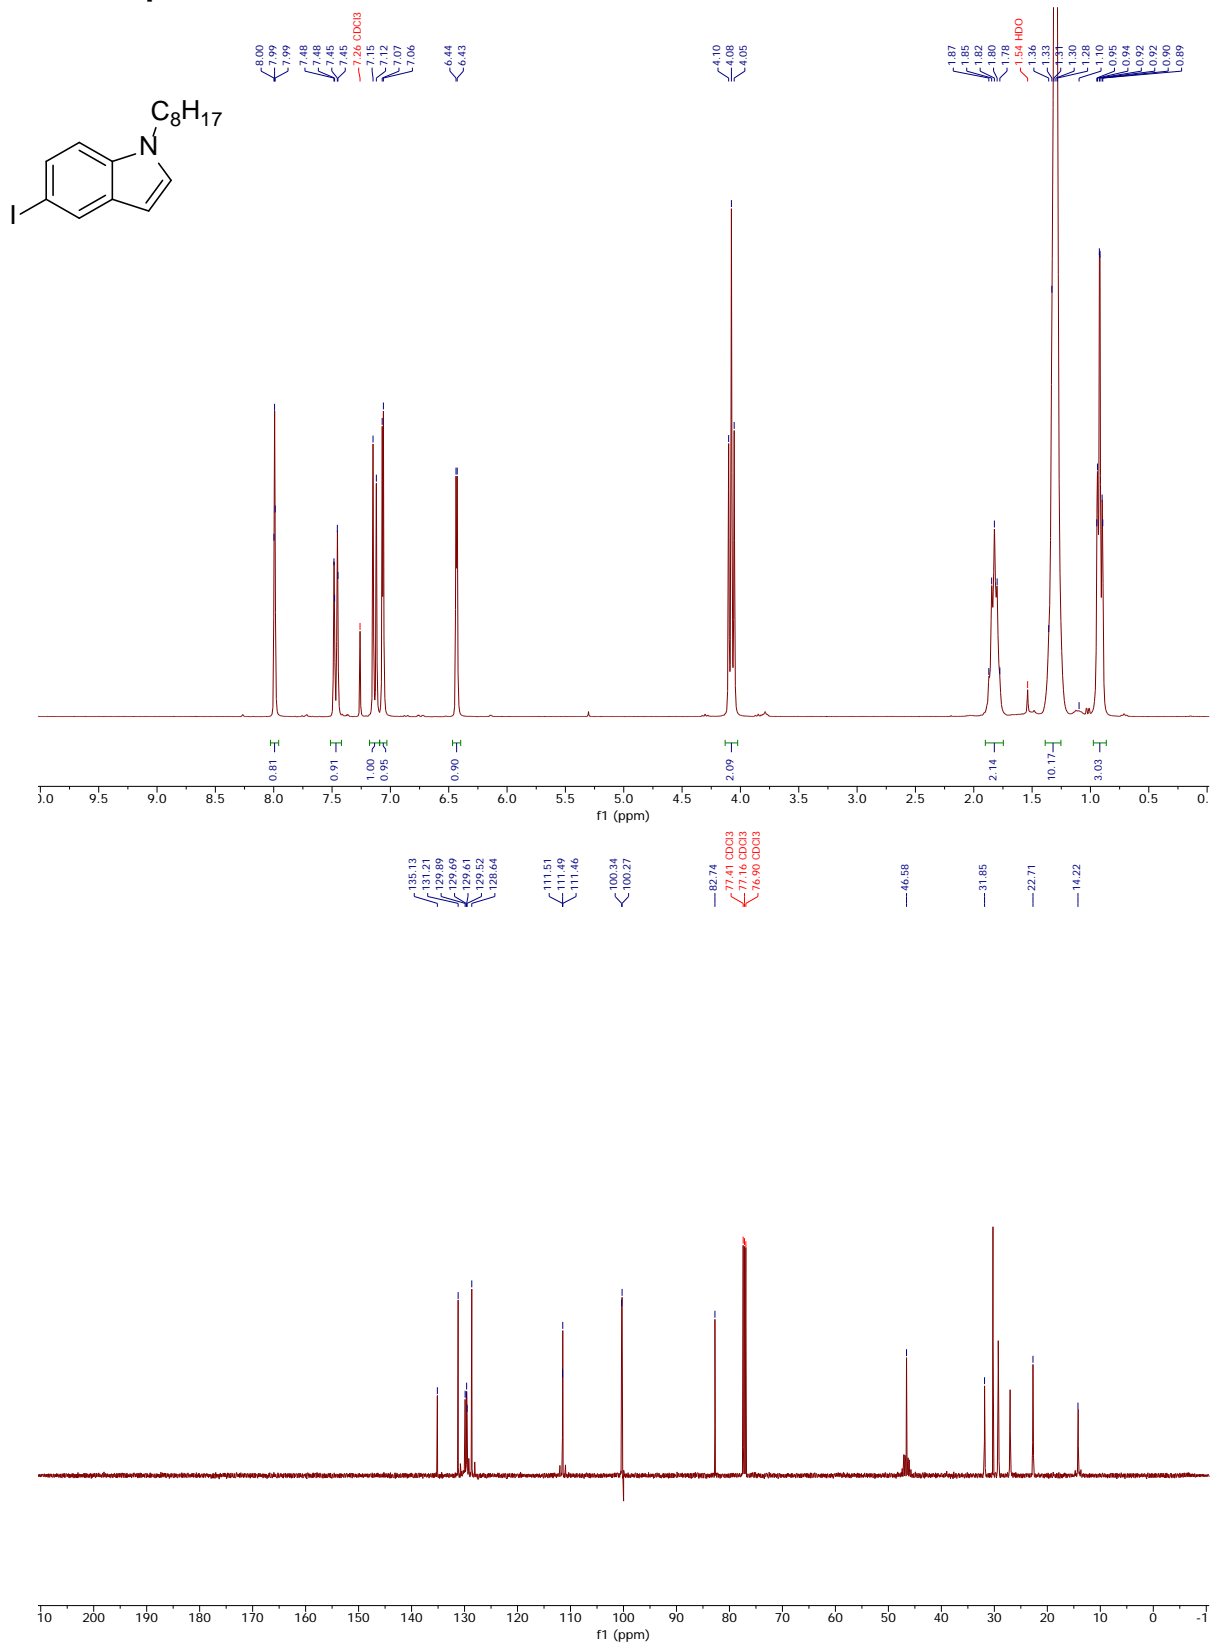

Figure S4:  $^1\text{H}$  NMR (top) and  $^{13}\text{C}$  NMR (bottom) of 1.

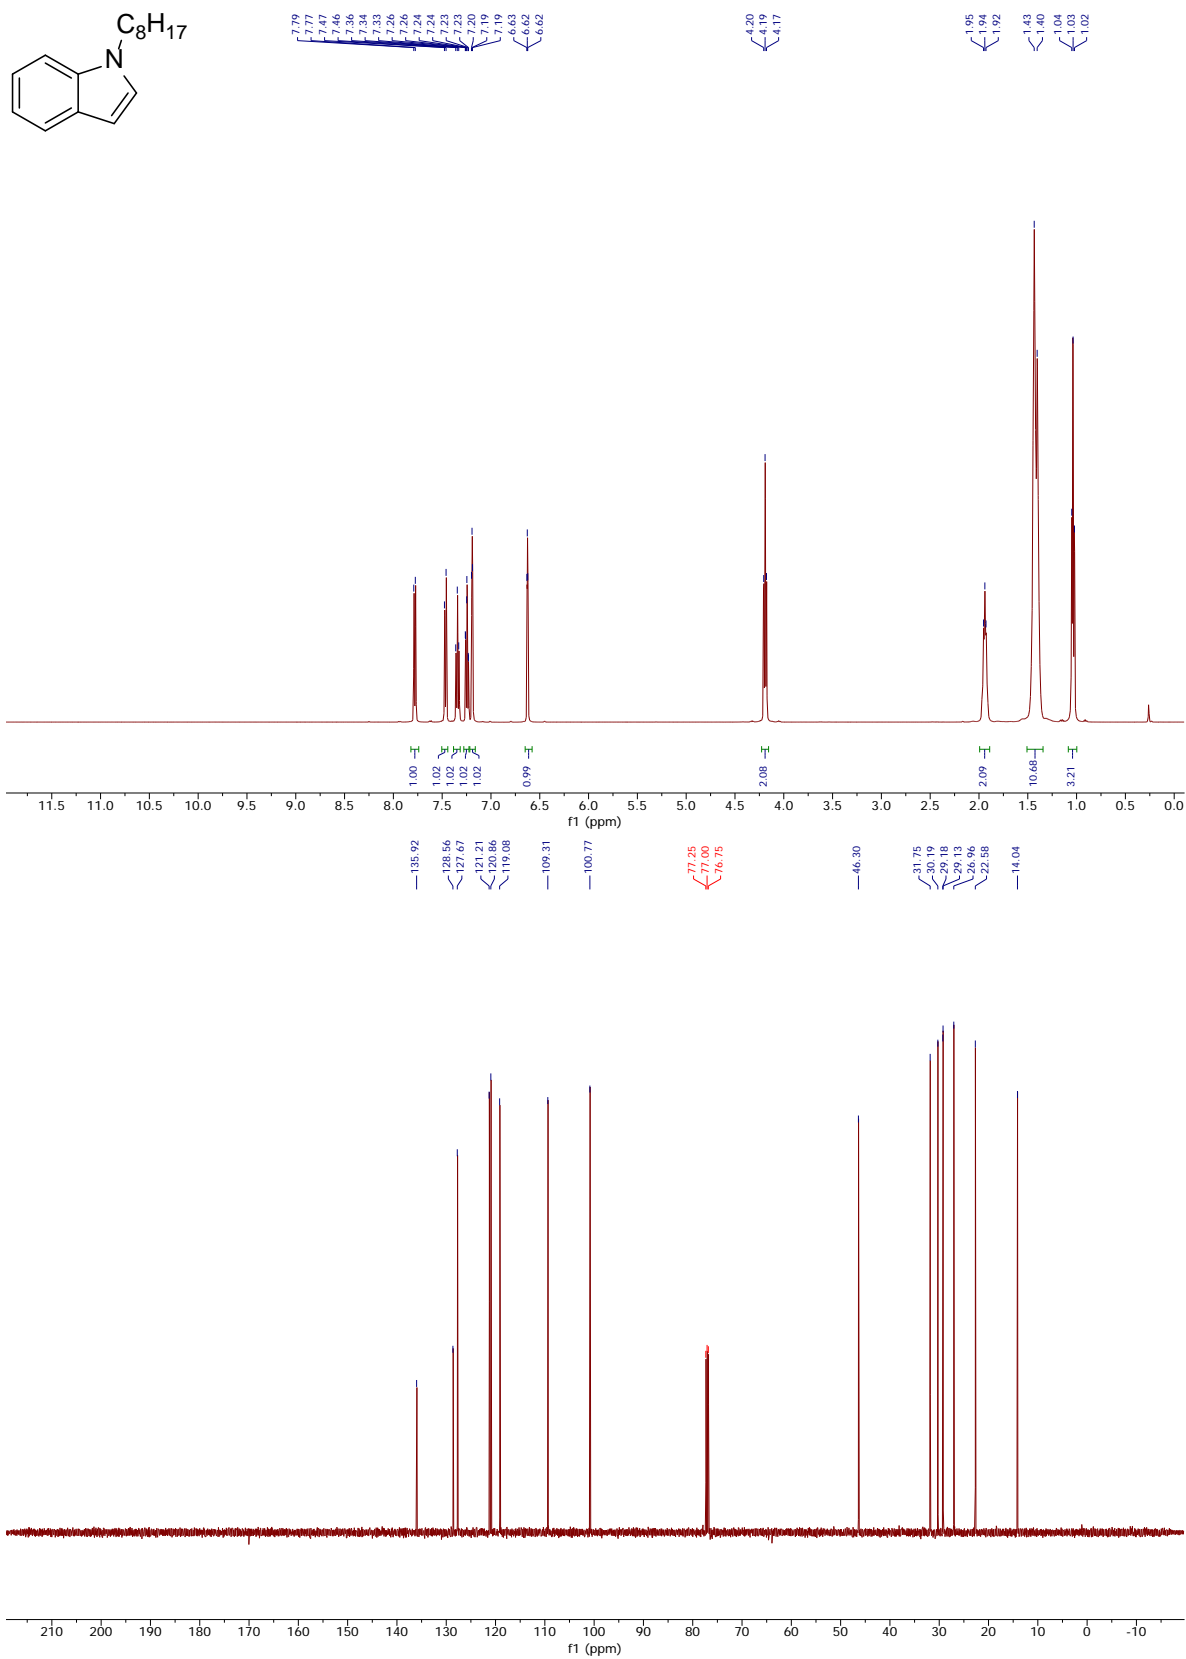

Figure S5:  $^1H$  NMR (top) and  $^{13}C$  NMR (bottom) of 1-octylindole.

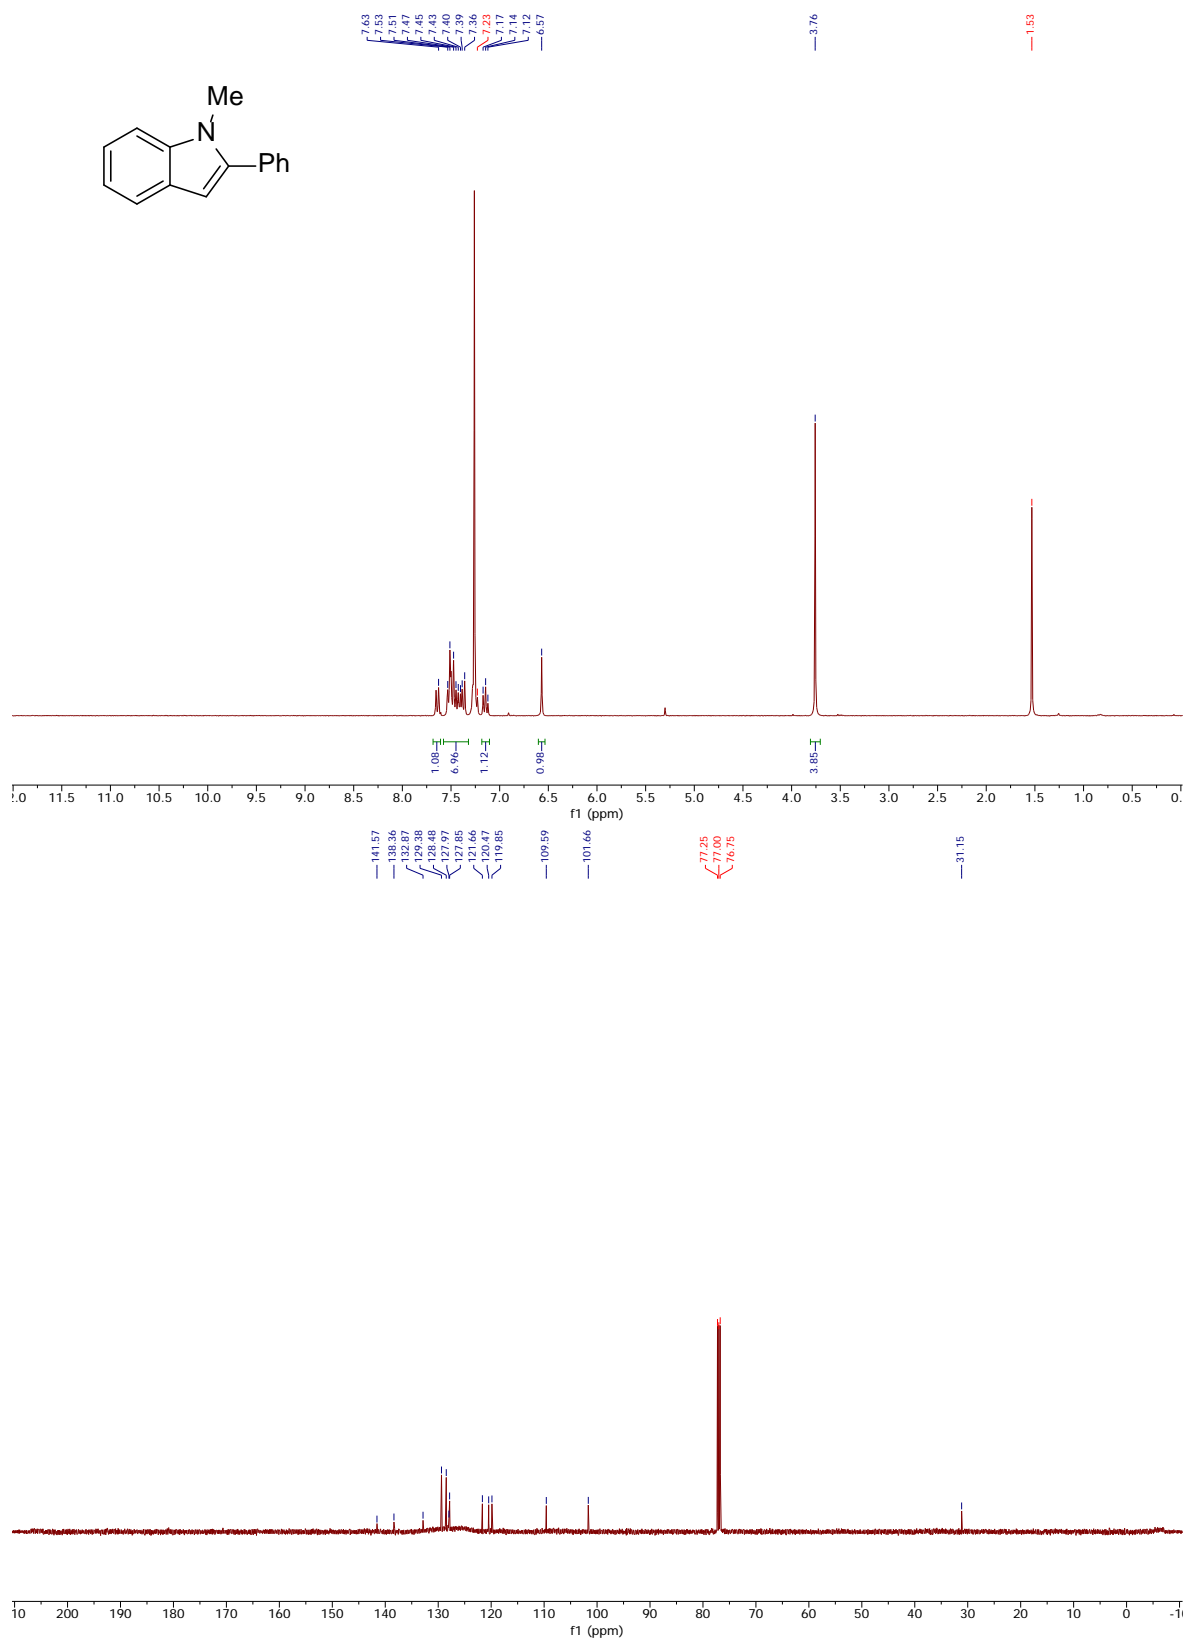

**Figure S6:** <sup>1</sup>H NMR (top) and <sup>13</sup>C NMR (bottom) of **3**.

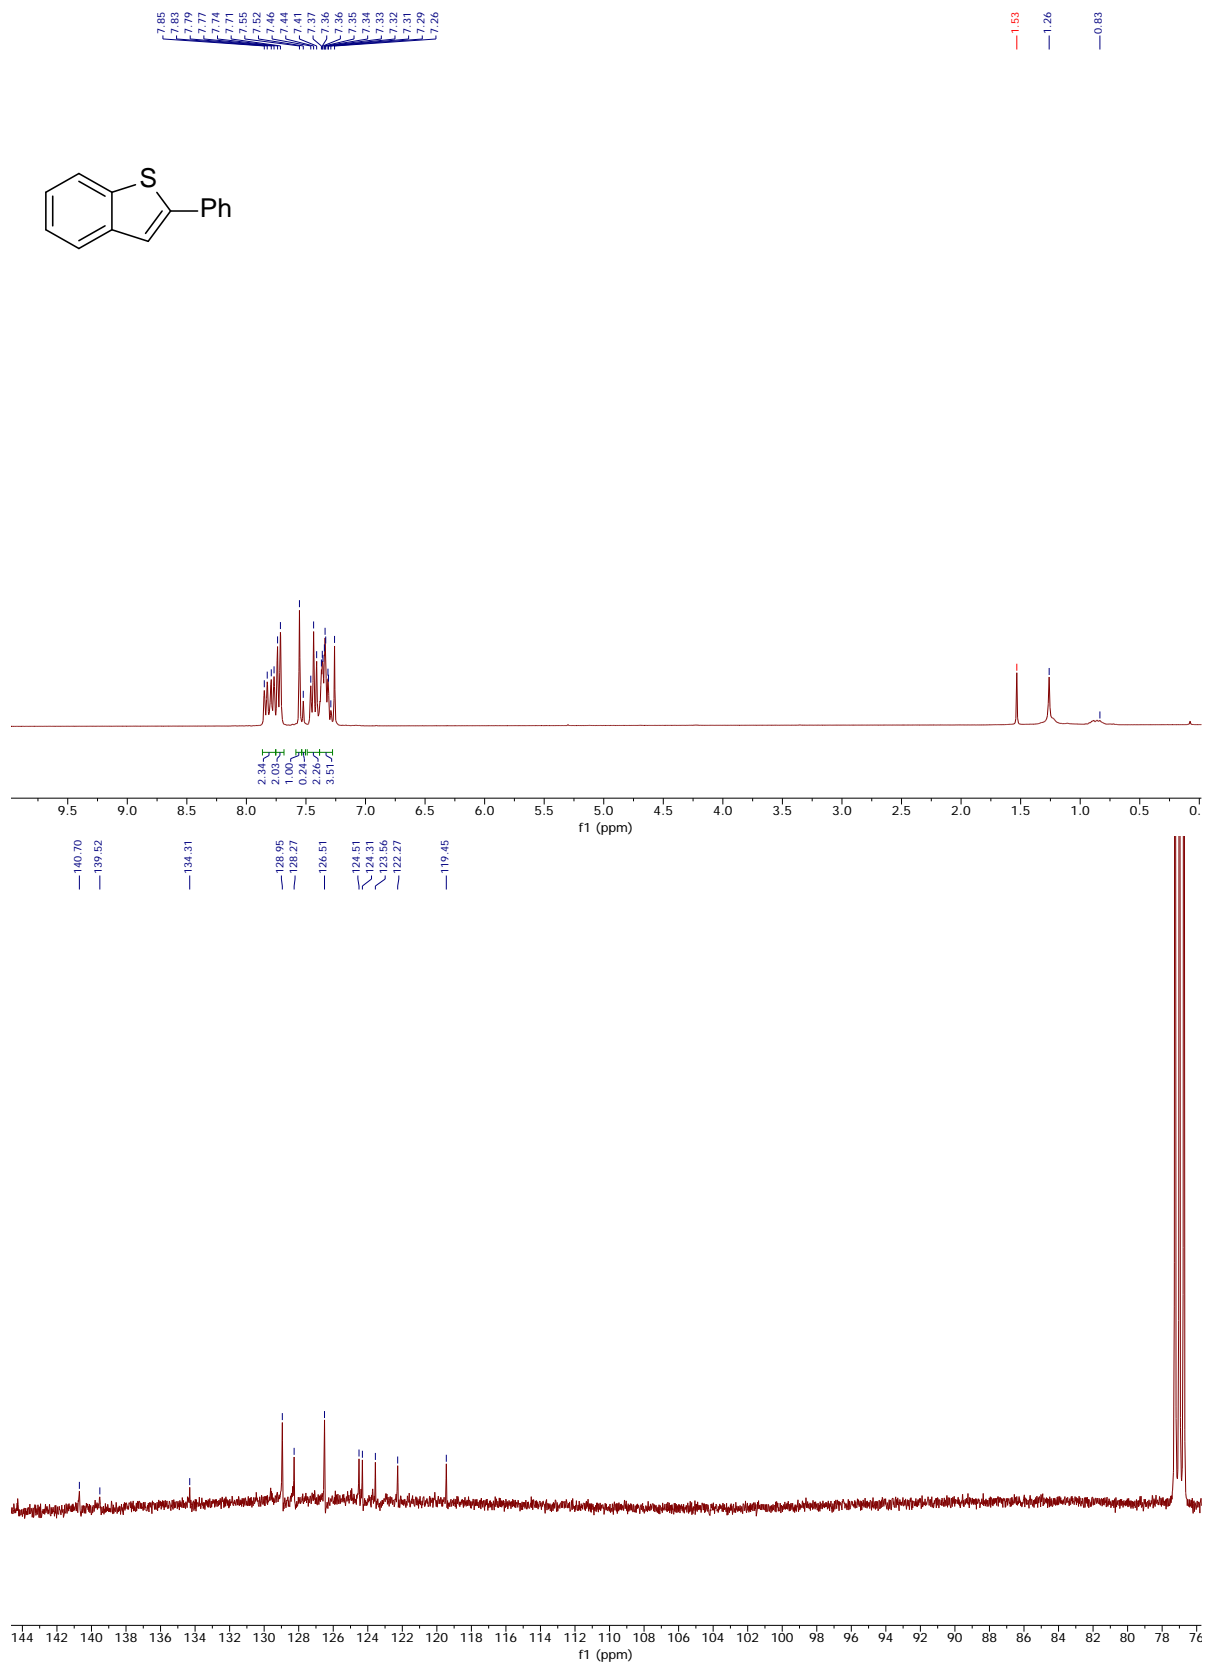

**Figure S7:** <sup>1</sup>H NMR (top) and <sup>13</sup>C NMR (bottom) of **12**.

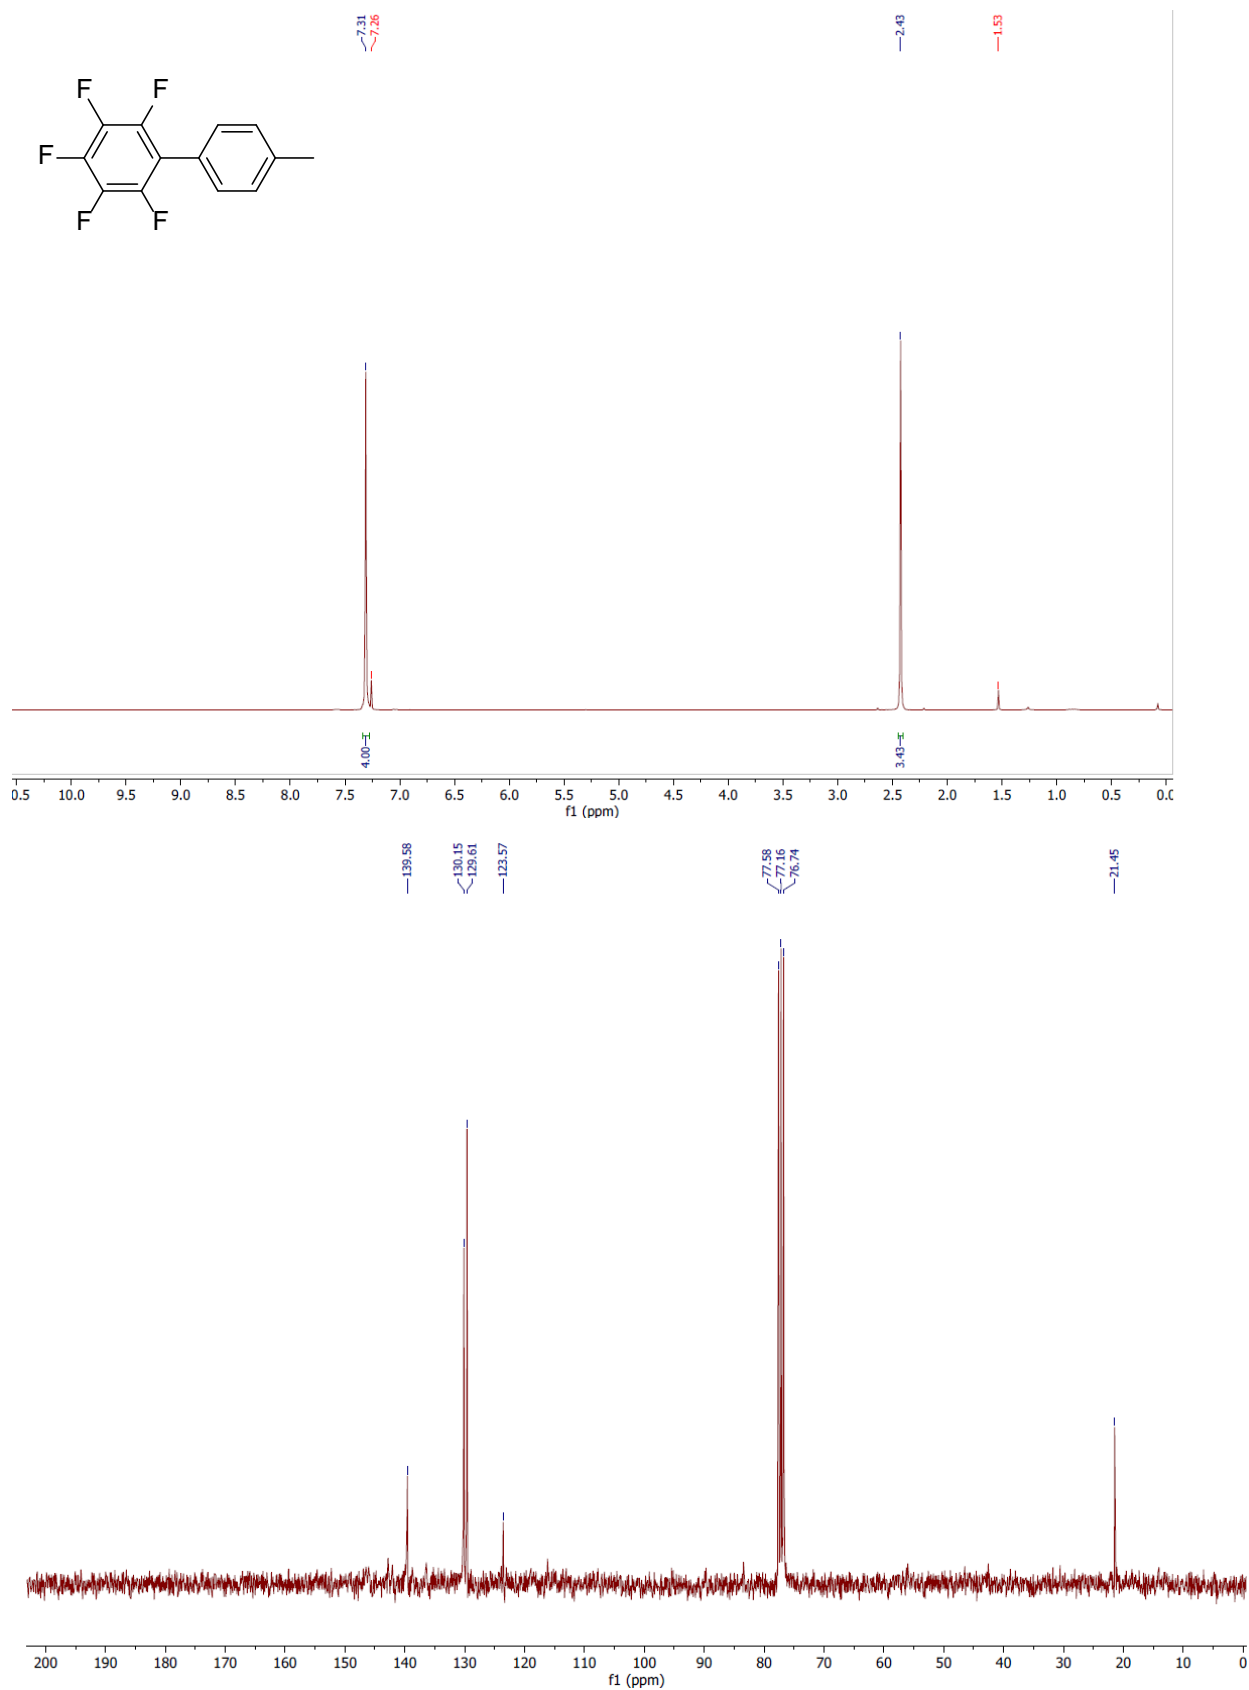

Figure S8: <sup>1</sup>H NMR (top) and <sup>13</sup>C NMR (bottom, excluding C<sub>6</sub>F<sub>5</sub>) of 13.

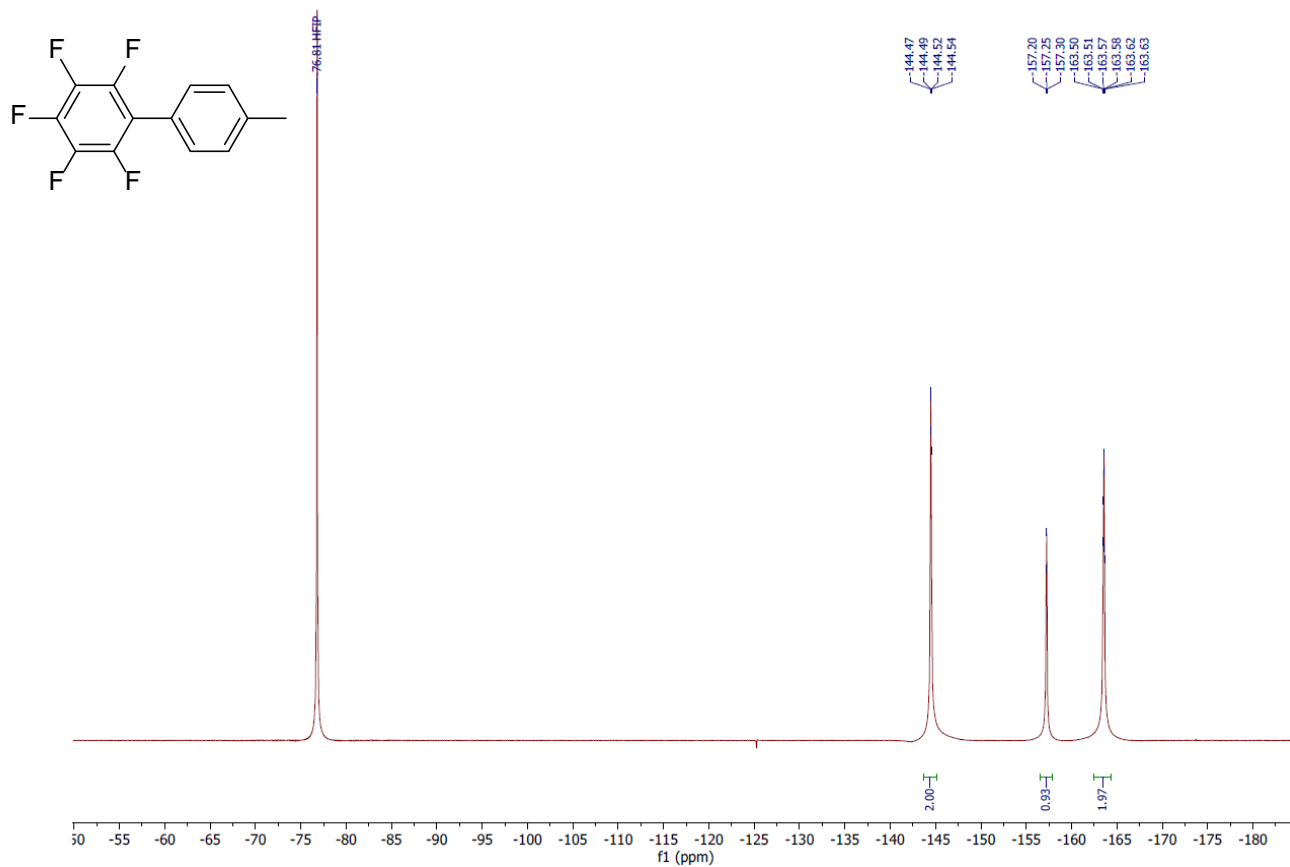

Figure S9: <sup>19</sup>F NMR of 13.
